# Supplementary material for: Nelfinavir augments proteasome inhibition by bortezomib in myeloma cells and overcomes bortezomib and carfilzomib resistance
Source: PubMed Central journal article supplement — Blood Cancer J. 2013 Mar 1;3(3):e103–. doi: 10.1038/bcj.2013.2 (PMC3615215; doi:10.1038/bcj.2013.2), 2013-03-01
Supplement: bcj20132x1.pdf [file bcj20132x1.pdf]

## Supplemental Table 1

### Induction of apoptosis by nelfinavir

RPMI8226 cells were incubated with nelfinavir at the concentrations indicated, and induction of apoptosis was quantified by measuring caspase 3/7 activity using the ApoOne assay (Promega) and fluorometric detection. The table indicates the relative increase in caspase 3/7 specific fluorescence relative to untreated control.

| 10   | 20    | 40    | $\mu$ M nelfinavir                                                       |
|------|-------|-------|--------------------------------------------------------------------------|
| 8.64 | 29.66 | 91.80 | % increase in<br>caspase 3/7 activity<br>(relative to untreated control) |
