# Supplementary material for: Nelfinavir augments proteasome inhibition by bortezomib in myeloma cells and overcomes bortezomib and carfilzomib resistance
Source: PubMed Central journal article supplement — Blood Cancer J. 2013 Mar 1;3(3):e103–. doi: 10.1038/bcj.2013.2 (PMC3615215; doi:10.1038/bcj.2013.2), 2013-03-01
Supplement: bcj20132x2.pdf [file bcj20132x2.pdf]

## Supplemental Table 2

### Combination indices

The table lists the combination indices (CI) as calculated using the method of Chou (ref 26). AMO-1 cells (top table) or bortezomib-resistant AMO-1a cells (middle table) were incubated with bortezomib (bzb) or carfilzomib (cfz) at the indicated concentrations, in combination with the indicated HIV-PI at 20  $\mu$ M. Bottom table: Combination indices for primary myeloma cells from 4 different patients, challenged with bortezomib 20 nM and nelfinavir (20  $\mu$ M).

#### combination indices

| <b>AMO wt</b>         | lopinavir | nelfinavir | ritonavir | saquinavir |
|-----------------------|-----------|------------|-----------|------------|
| bzb 5 nM + 20 $\mu$ M | 0.000     | 0.002      | 0.000     | 0.000      |
| cfz 5 nM + 20 $\mu$ M | 0.028     | 0.008      | 1.264     | 0.004      |

| <b>AMO 1a (adapted to bortezomib)</b> | lopinavir | nelfinavir | ritonavir | saquinavir |
|---------------------------------------|-----------|------------|-----------|------------|
| bzb 20 nM + 20 $\mu$ M                | 0.066     | 0.000      | 0.065     | 0.001      |
| cfz 20 nM + 20 $\mu$ M                | 0.26      | 0.004      | 0.274     | 0.027      |

| <b>Primary myeloma cells</b>      | patient 1 | patient 2 | patient 3 | patient 4 |
|-----------------------------------|-----------|-----------|-----------|-----------|
| Bzb sensitivity in vitro          | sensitive | sensitive | resistant | resistant |
| bzb 20 nM + 20 $\mu$ M Nelfinavir | 0.080     | 0.028     | 0.000     | 0.076     |
